# 1 **FADU: A Feature Counting Tool for Prokaryotic RNA-Seq** 2 **Analysis**

3 Matthew Chung<sup>1,2</sup>, Ricky S. Adkins<sup>1</sup>, Amol C. Shetty<sup>1</sup>, Lisa Sadzewicz<sup>1</sup>, Luke J. Tallon<sup>1</sup>, Claire M. Fraser<sup>1,3</sup>,  
4 David A. Rasko<sup>1,2</sup>, Anup Mahurkar<sup>1</sup>, and Julie C. Dunning Hotopp<sup>1,2,4,\*</sup>

5 <sup>1</sup>Institute for Genome Sciences, University of Maryland School of Medicine, Baltimore, MD 21201, USA

6 <sup>2</sup>Department of Microbiology and Immunology, University of Maryland School of Medicine, Baltimore,  
7 MD 21201, USA.

8 <sup>3</sup>Department of Medicine, University of Maryland School of Medicine, Baltimore, MD 21201, USA.

9 <sup>4</sup>Greenebaum Cancer Center, University of Maryland School of Medicine, Baltimore, MD 21201, USA.

10

11 MC: [mattchung@umaryland.edu](mailto:mattchung@umaryland.edu)

12 RSA: [sadkins@som.umaryland.edu](mailto:sadkins@som.umaryland.edu)

13 ACS: [ashetty@som.umaryland.edu](mailto:ashetty@som.umaryland.edu)

14 LS: [lsadzewicz@som.umaryland.edu](mailto:lsadzewicz@som.umaryland.edu)

15 LJ: [ljtallon@som.umaryland.edu](mailto:ljtallon@som.umaryland.edu)

16 CMF: [cmfraser@som.umaryland.edu](mailto:cmfraser@som.umaryland.edu)

17 DAR: [drasko@som.umaryland.edu](mailto:drasko@som.umaryland.edu)

18 AM: [amahurkar@som.umaryland.edu](mailto:amahurkar@som.umaryland.edu)

19 JCDH: [jdhotopp@som.umaryland.edu](mailto:jdhotopp@som.umaryland.edu)

## 20 **Abstract**

21 **Motivation:** The major algorithms for quantifying transcriptomics data for differential gene expression  
22 analysis were designed for analyzing data from human or human-like genomes, specifically those with  
23 single gene transcripts and distinct transcriptional boundaries that extend beyond the coding sequence  
24 (CDS) as identified through expressed sequence tags (ESTs) or EST-like sequence data. Some eukaryotic  
25 genomes and all, or nearly all, bacterial genomes require alternate methods of quantification since they  
26 lack annotation of transcriptional boundaries with EST or EST-like data, have overlapping transcriptional  
27 boundaries, and/or have polycistronic transcripts.

28 **Results:** An algorithm was developed and tested that better quantifies transcriptomics data for  
29 differential gene expression analysis in organisms with overlapping transcriptional units and  
30 polycistronic transcripts. Using data from standard libraries originating from *Escherichia coli* and  
31 *Ehrlichia chaffeensis*, and strand-specific libraries from the *Wolbachia* endosymbiont *wBm*, FADU can  
32 derive counts for genes that are missed by HTSeq and featureCounts. Using the default parameters with  
33 the *E. coli* data, FADU can detect transcription of 51 more genes than HTSeq in union mode and 21  
34 genes more than featureCounts, with 42 and 18 of these features being  $\leq 300$  bp, respectively. Due to its  
35 ability to derive counts for otherwise unrepresented genes without overstating their abundance, we  
36 believe FADU to be an improved tool for quantifying transcripts in prokaryotic systems for RNA-Seq  
37 analyses.

38 **Availability and implementation:** FADU is available at <https://github.com/adkinsrs/FADU>. FADU was  
39 implemented using Python3 and requires the PySAM module (version 0.12.0.1 or later).

40 **Contact:** [jdhotopp@som.umaryland.edu](mailto:jdhotopp@som.umaryland.edu)

## 41 **1 Introduction**

42 A typical analysis pipeline for a gene expression analysis of transcriptomics sequencing data involves: (a)  
43 mapping sequencing reads to a whole genome transcriptome assembly with an aligner like Bowtie  
44 (Langmead, et al., 2009), BWA (Li and Durbin, 2009), HISAT (Kim, et al., 2015), or STAR (Dobin, et al.,  
45 2013); (b) counting reads or fragments for each gene with a tool like HTSeq (Anders, et al., 2015) or  
46 Subread featureCounts (Liao, et al., 2014); and (c) finding differentially expressed genes through the use  
47 of tools like DESeq (Anders and Huber, 2010) and edgeR (Robinson, et al., 2010). Most of these tools  
48 were designed to analyze human data, and as such, they carefully consider important issues that affect  
49 these analyses, such as transcript splicing. However, important and relevant genomic features in other  
50 organisms complicate transcriptomics analyses in ways unaddressed with this human-centric focus, for  
51 example the polycistronic transcripts of bacterial operons.

52 Most commonly identified in prokaryotes, operons are transcriptional units that encode polycistronic  
53 transcripts with multiple coding sequences (CDSs). This allows for the coordinated transcription and  
54 regulation of all the genes in an operon. As an example, the *lac* operon encodes a permease for  
55 transporting lactose into the cell and a  $\beta$ -galactosidase which converts lactose to galactose and glucose,  
56 allowing for the cis-regulation of multiple functional related genes under a single promoter (Lewis,  
57 2013).

58 Presently, the two most popular tools for transcriptome analyses are HTSeq (Anders, et al., 2015) and  
59 Subread featureCounts (Liao, et al., 2014). Although in most cases, both tools have no issue quantifying  
60 transcripts for specific genes, issues arise when a single fragment can be assigned to multiple genes. By  
61 default, both HTSeq and featureCounts bin these reads as ambiguous, rather than assigning them to a  
62 specific gene. While this may not be as significant of a problem in eukaryotic systems, the features of a  
63 prokaryotic genome, namely the smaller gene size, smaller genome size, and the presence of operons,

64 make it difficult for HTSeq and featureCounts to quantify smaller genes, especially those within operons  
65 that are smaller than the library insert size.

66 Here, we test how operons and polycistronic transcripts confound HTSeq and featureCounts, leading to  
67 a lack of sequencing data for small genes within operons. We developed a new tool, Feature Aggregate  
68 Depth Utility (FADU) to quantify transcription in bacterial genomes. We test FADU on multiple bacterial  
69 genomes to demonstrate its utility at capturing sequence data for these underrepresented genes.

## 70 **2 System and Methods**

### 71 **2.1 Availability of data sets**

72 Three data sets were used in all analyses consisting of RNA-Seq paired-end data from standard, non-  
73 stranded libraries originating from (a) *E. coli* and (b) *E. chaffeensis* and stranded libraries from (b) *wBm*.  
74 The sequencing reads for the three datasets can be found in the NCBI Sequencing Read Archive at the  
75 following accession numbers, respectively: (pending), SRX485438, and SRX2505171.

### 76 **2.2 FADU, featureCounts, and HTSeq comparisons**

77 For comparative analyses, FADU was run using `--count_by fragment` and all other default options. HTSeq  
78 v0.10.0 (Anders, et al., 2015) was run using default settings while changing the mode for mode-specific  
79 analyses. Subread featureCounts v1.6.1 (Liao, et al., 2014) was run using the `-p` option to specify  
80 counting by fragments and/or `-O` or `-fractional` to specify counting different methods of counting  
81 ambiguous reads depending on the analysis. Unrooted dendrograms were generated using the R  
82 package APE v5.0 (Analysis of Phylogenetics and Evolution) (Paradis, et al., 2004; Popescu, et al., 2012).  
83 Bootstrap values were obtained using the R package pvclust v2.0-0 (Suzuki and Shimodaira, 2006). The  
84 principal component analysis was performed using the R packages FactoMineR v1.39 (Le, et al., 2008)  
85 and factoextra v1.0.5 (<http://sthda.com/english/rpkgs/factoextra/>).

## 86 **3 Algorithm**

### 87 **3.1 Creating a mapping index using an annotation file**

88 A mapping index is created that contains each position in the reference genome. For each feature  
89 present in the GFF3 or GTF annotation input file, coordinates are marked in the mapping index for each  
90 of the features' positions. If the reads are 'stranded' or 'reverse-stranded', a separate mapping index is  
91 created and marked for each strand. Each of these coordinates are marked using the features' attribute  
92 id. At positions shared by multiple features, the position will be marked as an overlap between two  
93 features. These positions, along with positions absent of any feature, will be excluded from downstream  
94 feature count calculations. From this, a statistics file will be written that contains the following  
95 information for each feature: (a) strand, (b) length of feature, (c) number of coordinates mapping solely  
96 to that gene, (d) proportion of non-overlapping coordinates compared to length of feature.

### 97 **3.2 Calculating read/fragment counts for each feature**

98 For each BAM file, the read depth is calculated using the depth function of samtools with the `-aa` option  
99 If FADU is set to calculate fragment depth, all non-properly-paired reads are discarded by default and  
100 the read depth is adjusted to determine the fragment depth at all positions. The user can elect to keep  
101 all mapped read (as opposed to properly paired reads), including singletons and discordant reads, in  
102 which case all reads will be included in the fragment depth totals. To calculate the fragment depth from  
103 the samtools depth output, for each of the properly-paired reads, all coordinates in the insert region  
104 between the paired reads are incremented by one and coordinates where the reads overlap are  
105 decremented by one. If BAM data is identified as "stranded" or "reverse-stranded", each BAM file is split  
106 into a "(+)-stranded" and a "(-)-stranded" BAM file, based on the bitwise flag field in the input BAM file.  
107 Each stranded BAM will have its read or fragment depth calculated separately.

108 For each input BAM file, the average read length or average fragment length is determined to calculate  
109 counts for each feature. If the option to keep only properly paired reads is set, then only those reads will  
110 factor into the average read or fragment length calculations.

111 For each feature, all the coordinates that mapped solely to this feature are collected. The total depth of  
112 this feature is calculated by summing the read or fragment depth for each coordinate collected in the  
113 feature, and this total is divided by the average read or fragment length to derive a fragment count for  
114 each feature. The feature ID and count statistic is written to a file. If multiple BAM files were used as  
115 input, then the counts of each individual input will be written to a separate file.

## 116 **4 Implementation**

117 FADU was written entirely using the Python3 programming language. It relies heavily on the PySam  
118 module (version 0.12.0.1 or later) to parse information from the BAM alignment files, to write  
119 intermediate BAM files, and to perform basic samtools commands. The program supports  
120 multiprocessing, and the user can specify the number of processes to be utilized. Each process will  
121 handle a separate BAM input file if a list of files is provided. FADU was tested in the UNIX environment.

122 To minimize the amount of memory used, temporary files are written when possible to keep track of  
123 read depth and the coordinates of properly paired reads. In addition, when read depth is converted into  
124 fragment depth, only the bases with nonzero depth are read into memory.

## 125 5 Results

### 126 5.1 Gene detection performance of FADU, HTSeq, and featureCounts

127 To assess how FADU compares to featureCounts and HTSeq in deriving counts, we used paired-end  
128 sequencing data from three different sets of transcriptome data: (a) paired end reads from a standard  
129 (i.e. not strand-specific) library constructed from *Escherichia coli* RNA, (b) paired end reads from a  
130 standard library constructed from *Ehrlichia chaffeensis* RNA, and (c) paired-end reads from a strand-  
131 specific library constructed from *Wolbachia* endosymbiont of *Brugia malayi* wBm RNA.

132 Of the 4,647 protein-coding genes detected in *E. coli*, counts for 51 genes could be obtained using FADU,  
133 but not HTSeq union, the default HTSeq mode (**Figure 2a**). Because HTSeq union discards fragments  
134 spanning multiple features, in the case when unstranded data is being used, HTSeq union is likely unable  
135 to identify these genes because: (1) the gene is largely overlapping another feature either on the same  
136 or opposite strand or (2) the gene is within an operon and smaller than the average library fragment  
137 size. Because FADU calculates counts based on the depth at only positions unique to any given feature,  
138 FADU can assign partial counts to multiple features per fragment, allowing for the increased  
139 representation of smaller genes, as well as the unique portion, if any, of overlapping genes. Supporting  
140 this, 42 of the 51 genes unable to be detected with HTSeq union are  $\leq 300$  bp in size (**Table 1**). While  
141 HTSeq union and featureCounts are largely similar, featureCounts handles ambiguous reads differently.  
142 Given a fragment that maps to multiple features, featureCounts will assign the paired-end fragment to  
143 the feature that maps to the majority of the individual paired-end reads (Liao, et al., 2014). When  
144 comparing FADU with featureCounts. 21 genes were only detected using FADU, with 18 of these genes  
145 being  $\leq 300$  bp in size (**Figure 2b**).

146 Similarly, FADU can derive counts for an additional five genes in *E. chaffeensis* compared to HTSeq union  
147 or an additional two genes when compared to featureCounts. All genes detected only with FADU in *E.*

148 *chaffeensis* were  $\leq 300$  bp in length. With *wBm*, 31 additional genes were detected in FADU when  
149 compared to HTSeq union, of which 10 are  $\leq 300$  bp, while 24 additional genes were detected when  
150 compared to featureCounts, of which 7 are  $\leq 300$  bp (**Figure 2ab**). This indicates that despite  
151 featureCounts being able to detect a greater number of genes than HTSeq union, FADU can derive  
152 counts for genes that neither HTSeq or featureCounts can by default.

153 HTSeq has two additional modules to derive counts for transcriptome data that both attempt to assign  
154 ambiguous reads. In the case that a fragment overlaps multiple features, HTSeq intersection-nonempty  
155 takes the intersect of the features found at each non-empty position and if only one feature is returned,  
156 a count is assigned to that feature. Similarly, HTSeq intersection-strict takes the intersect of the features  
157 found at all positions of the fragment and again, if only one feature is returned, a count is assigned to  
158 that feature (Anders, et al., 2015). While this allows for the assignment of more ambiguous fragments,  
159 smaller genes are still under-represented. Additionally, because HTSeq intersection-strict also discards  
160 fragments that partially map to intergenic regions, and because most prokaryotic organisms currently  
161 have no UTR annotations, this will result in discarding reads at the 5'- and 3'-end of prokaryotic  
162 transcripts. In all cases, for genes smaller than the library insert size, it becomes difficult to extract any  
163 meaningful fragment counts.

164 When comparing FADU to HTSeq intersection-strict, FADU derives counts for an additional 182 genes.  
165 HTSeq intersection-strict fails to obtain counts for >100 additional genes compared to HTSeq union  
166 (**Supplementary Figure 1ab**), confirming the inability of HTSeq-intersection-strict to accurately assess  
167 prokaryotic transcriptome data for instances in which the reference has limited UTR annotations.

168 Supporting this, HTSeq intersection-strict fails to detect an additional 60 genes in *E. chaffeensis* and 71  
169 genes in *wBm* when compared to FADU. HTSeq intersection-nonempty performs similarly to HTSeq  
170 union, failing to detect 48, 4, and 31 genes when compared to FADU in *E. coli*, *E. chaffeensis*, and *wBm*,



171 respectively, indicating regardless of which module used, HTSeq is too conservative in assigning reads to  
172 genes.

173 While featureCounts does not have any distinct modules, there are two options which help to assign  
174 counts for ambiguous reads. The first is the -O option, in which cases where a fragment overlaps  
175 multiple features, a single count is added to both. The second is specifying both the -O and the -  
176 fragment options, in which case fragments that overlap  $x$  features are given a count of  $1/x$ . For the *E.*  
177 *chaffeensis*, and *wBm* datasets, FADU obtains counts for the same number of genes as both  
178 featureCounts overlap and featureCounts fractional-overlap (**Supplementary Figure 2ab**). However, in  
179 the *E. coli* dataset, both modes of featureCounts have counts for nine additional genes compared to  
180 FADU. Of these nine *E. coli* genes, eight are completely overlapped by another gene either on the same  
181 or opposite strand. Because these genes have no unique positions with which FADU can use to  
182 determine count values, FADU returns a fragment count of 0 for these genes. The last gene,  
183 E2348C\_0713, is 642 bp long with the first 104 bp being overlapped by another gene. At most,  
184 featureCounts overlap gives E2348C\_0713 a fragment count of 2, while featureCounts fractional-overlap  
185 assigns a count of 1, indicating that only two fragments map to E2348C\_0713 map within the first 104  
186 bp. Because FADU calculates fragment counts using only unique positions of a gene, FADU assigns a  
187 fragment count of 0 to E2348C\_0713.

## 188 **5.2 Comparative analysis of FADU, HTSeq, and countFeatures in wBm**

189 Using the *wBm* dataset, we sought to determine the similarity of FADU compared to each of the  
190 different modes of HTSeq and featureCounts. Fragment count values from the three HTSeq modules,  
191 three featureCounts modes, and FADU were used for a clustering analysis. An unrooted dendrogram of  
192 the different tools shows three distinct groups that cluster on how each of the different tools handle  
193 fragments mapping to multiple features (**Figure 3a**). FADU, featureCounts overlap, and featureCounts  
194 fractional-overlap, which are more liberal in assigning counts, form a cluster while HTSeq union, HTSeq

195 intersection-nonunique, and featureCounts default, which are all more conservative, form another  
196 cluster. HTSeq intersection-strict clusters with neither of the groups, due to it being the most stringent  
197 in assigning fragment counts to features.

198 A heatmap showing counts from each of the eight tools shows HTSeq intersection-strict to have the  
199 greatest number of genes with no assigned counts (**Figure 3b**). Only genes with derived count values  
200 from at least one tool are shown. The cluster containing featureCounts default, HTSeq union, and HTSeq  
201 intersection non-empty contain slightly less genes with no assigned count values while the cluster  
202 containing FADU, featureCounts overlap and featureCounts fractional-overlap contain the least.

203 Although featureCounts overlap is able to assign count values to the same number of genes as FADU, it  
204 over-counts genes by assigning a full count value to all genes overlapped by a single fragment. In the  
205 case of a fragment overlapping a two gene operon, featureCounts overlap would assign a full count to  
206 both, despite there only being a single fragment. To diminish over-counting, featureCounts fractional-  
207 overlap instead assigns a fractional count value based on the number of features a fragment overlaps.  
208 While this alleviates the issue, featureCounts fractional-overlap implies that all features overlapped by a  
209 fragment contribute equally to the fragment, which may not necessarily be true. The problem is  
210 particularly acute if the overlap is a relatively small fraction of the feature. FADU assigns count values  
211 based on the percentage of the fragment that is overlapped, such that a higher partial read count is  
212 assigned to the gene with the greater overlap. By doing so, FADU can assign higher counts from  
213 ambiguous fragments to genes that the fragment most likely originated from, while still being able to  
214 derive counts for smaller genes.

215 A principal component analysis of the counts show less discrete clusters compared to those seen in the  
216 unrooted dendrogram (**Figure 3c**). While the counts from HTSeq union and HTSeq intersection-  
217 nonempty are grouped together, no other two counts cluster closely with another. In the first principal  
218 component, which accounts for 68.0% of the variation observed in the counts, the top 20 contributing

219 genes are primarily represented by genes with lower counts in the three HTSeq modes relative to  
220 featureCounts and FADU (**Supplementary Figure 3a**). Similarly, the top 20 contributing genes in the  
221 second principal component, which accounts for 23.9% of the variation observed, separates the HTSeq-  
222 derived counts from the featureCounts and FADU counts (**Supplementary Figure 3b**). In both principal  
223 components, there are genes with lower counts in HTSeq intersection-strict relative to all other counts,  
224 reflecting the conservative nature in which it assigns counts. Because of how featureCounts overlap  
225 derives counts, it will always have greater than or equal to the highest number of counts relative to all  
226 other algorithms tested.

## 227 **6 Discussion**

228 During transcript quantification for RNA-Seq analyses, the handling of fragments that overlap multiple  
229 features must be addressed. This may not be as much of an issue in many eukaryotes, where genes are  
230 larger and spaced further apart. But in prokaryotes, the closer proximity of genes coupled with the  
231 presence of operons leads to a large number of fragments being classified as ambiguous. Tools such as  
232 HTSeq and featureCounts have different modules and/or options to handle these ambiguous fragments,  
233 but smaller genes, especially those in operons, become either under- or over-represented depending on  
234 the tool. In this study, we present FADU, a novel tool for transcript quantification in RNA-Seq analyses  
235 that addresses these issues.

236 While it can be easy to think of all Illumina data as being equal, our analysis suggests that small genes  
237 near or below the insert size of the library are specifically being lost. This bears more scrutiny and  
238 consideration in prokaryotic transcriptomic sequencing projects, since the insert size of the library varies  
239 between samples and is not frequently reported. Our results suggest that these small genes could be  
240 differentially reported, in a purely artefactual way, during feature counting and impacts downstream  
241 analyses, like differential expression, clustering, and PCA-type analyses.

242 Importantly, FADU is not a counting algorithm and as such does not report counts as other algorithms  
243 have over the past several years. As such, it does not return integers, instead returning fraction-based  
244 rational numbers. As such the output of FADU cannot be used in downstream tools that require integer  
245 counts, such as some differential expression analysis tools. It can, however, be used with success in  
246 edgeR and in calculating TPMs and z-scores. There may, however, be a new need for further  
247 development of statistical analysis tools that do not require integer-based data.

248 Compared to the default HTSeq and featureCounts modes, which largely discard ambiguous reads, FADU  
249 assigns partial read counts based on the percentage of the fragment that is within the unique positions  
250 of gene. By doing this, FADU is able to assign partial counts to features that are missed by both HTSeq  
251 and featureCounts by default. While HTSeq and featureCounts have options that allow for the  
252 assignment of reads to these features, we find that both the overlap and fractional-overlap options  
253 overstate their abundance, especially in the case of completely overlapped genes. FADU weighs the  
254 percentage of each fragment covered by a feature so in the case that a fragment does overlap multiple  
255 features, instead of assigning equal counts to both features, partial read counts are assigned based on  
256 the percentage of the fragment covered by the feature. Due to its ability to derive counts for otherwise  
257 unrepresented genes without overstating their abundance, we believe FADU to be an improved tool for  
258 quantifying transcripts in prokaryotic systems for RNA-Seq analyses.

## 259 **Acknowledgements**

260 This project was funded in part by federal funds from the National Institute of Allergy and Infectious  
261 Diseases, National Institutes of Health, Department of Health and Human Services under grant number  
262 U19 AI110820.

## 263 **References**

- 264 Anders, S. and Huber, W. Differential expression analysis for sequence count data. *Genome Biol*  
265 2010;11(10):R106.
- 266 Anders, S., Pyl, P.T. and Huber, W. HTSeq--a Python framework to work with high-throughput  
267 sequencing data. *Bioinformatics* 2015;31(2):166-169.
- 268 Dobin, A., *et al.* STAR: ultrafast universal RNA-seq aligner. *Bioinformatics* 2013;29(1):15-21.
- 269 Kim, D., Langmead, B. and Salzberg, S.L. HISAT: a fast spliced aligner with low memory requirements.  
270 *Nat Methods* 2015;12(4):357-360.
- 271 Langmead, B., *et al.* Ultrafast and memory-efficient alignment of short DNA sequences to the human  
272 genome. *Genome Biol* 2009;10(3):R25.
- 273 Le, S., Josse, J. and Husson, F. FactoMineR: An R Package for Multivariate Analysis. *Journal of Statistical*  
274 *Software* 2008;25(1):1-18.
- 275 Lewis, M. Allosteric and the lac Operon. *J Mol Biol* 2013;425(13):2309-2316.
- 276 Li, H. and Durbin, R. Fast and accurate short read alignment with Burrows-Wheeler transform.  
277 *Bioinformatics* 2009;25(14):1754-1760.
- 278 Liao, Y., Smyth, G.K. and Shi, W. featureCounts: an efficient general purpose program for assigning  
279 sequence reads to genomic features. *Bioinformatics* 2014;30(7):923-930.
- 280 Paradis, E., Claude, J. and Strimmer, K. APE: Analyses of Phylogenetics and Evolution in R language.  
281 *Bioinformatics* 2004;20(2):289-290.
- 282 Popescu, A.A., Huber, K.T. and Paradis, E. ape 3.0: New tools for distance-based phylogenetics and  
283 evolutionary analysis in R. *Bioinformatics* 2012;28(11):1536-1537.
- 284 Robinson, M.D., McCarthy, D.J. and Smyth, G.K. edgeR: a Bioconductor package for differential  
285 expression analysis of digital gene expression data. *Bioinformatics* 2010;26(1):139-140.

286 Suzuki, R. and Shimodaira, H. Pvclust: an R package for assessing the uncertainty in hierarchical  
287 clustering. *Bioinformatics* 2006;22(12):1540-1542.

288

289 **Table 1. Key Properties of Data Examined**

| <b>Species</b>                                           | <b><i>E. coli</i></b> | <b><i>E. chaffeensis</i></b> | <b>Bm</b>      |
|----------------------------------------------------------|-----------------------|------------------------------|----------------|
| Strand-Specificity                                       | no                    | no                           | reverse        |
| Number of Sequenced Paired-End Reads                     | 215,149,159           | 46,817,709                   | 75,945,674     |
| Number of Mapped Paired-End Reads                        | 184,454,369 (85.7%)   | 3,132,709 (6.7%)             | 351,928 (0.5%) |
| Genes                                                    | 4,647                 | 1,002                        | 1,006          |
| Genes Detected in FADU but not HTSeq<br>or featureCounts | 51                    | 5                            | 31             |

290



## 291 **Figure Legends**

### 292 **Figure 1: Comparison of TPM values derived from FADU to HTSeq union and** 293 **featureCounts default**

294 For three different sets of RNA-Seq paired-end data from *E. coli*, *E. chaffeensis*, and *wBm*, the  $\log_2$  TPM  
295 values for genes quantitated using FADU were plotted against the  $\log_2$  TPM values for genes quantitated  
296 with **(A)** HTSeq union and **(B)** featureCounts default. Each point is representative of a single gene, with  
297 points in blue being representative of genes  $\leq 300$  bp in length. Genes with similar count values are  
298 expected to lie close to the identity line ( $x=y$ ; red). Genes whose expression values are more elevated in  
299 FADU lie above the identity line while genes whose expression values are elevated in HTSeq of  
300 featureCounts lie below the identity line. Genes able to be quantified in FADU but not in HTSeq union or  
301 featureCounts default lie on the y-axis. These genes include very highly transcribed genes suggesting  
302 that they are missed by all the tools except FADU, and not that they are poorly transcribed, small genes.

### 303 **Figure 2: Clustering patterns of the different count values in wBm derived with** 304 **HTSeq modules, featureCounts modes, and FADU**

305 **(A)** An unrooted dendrogram with 1000 bootstraps was generated using the  $\log_2$  count values from  
306 *wBm* calculated using HTSeq, featureCounts, and FADU. The dendrogram reveals three distinct clusters  
307 of (1) featureCounts default, HTseq union, and HTSeq intersection-nonempty; (2) HTSeq intersection-  
308 strict; and (3) FADU, featureCounts overlap, and featureCounts fractional-overlap. **(B)** The  $\log_2$  count  
309 values for all *wBm* genes with count values derived from at least one of the tools was used to generate a  
310 heatmap. The *wBm* genes are displayed on the horizontal axis while each of the tools are displayed on  
311 the vertical axis. All cells in grey describe genes with no count value in its corresponding tool. Bootstrap  
312 values for both the unrooted and squared dendrograms are located next to their corresponding nodes.  
313 **(C)** A principal component analysis for all *wBm* count values derived from each of the tools was done.  
314 Each color corresponds to either FADU, HTSeq, or featureCounts, while each shape represents the  
315 specific mode of the tool used.

316 **Supplementary Figure 1: Comparison of TPM values derived from FADU to**  
317 **HTSeq intersection-nonempty and intersection-strict**

318 For each of the three different sets of RNA-Seq paired-end data from *E. coli*, *E. chaffeensis*, and *wBm*,  
319 the  $\log_2$  TPM values for genes quantified using FADU were plotted against the  $\log_2$  TPM values for genes  
320 quantified with two of the non-default HTSeq modules: **(a)** HTSeq intersection-nonempty and **(b)** HTSeq  
321 intersection-strict. Each point is representative of a single gene, with points in blue being representative  
322 of genes  $\leq 300$  bp in length. Genes with similar count values are expected to lie close to the identity line  
323 ( $x=y$ ; red). Genes whose expression values are more elevated in FADU lie above the identity line while  
324 genes whose expression values are elevated in the HTSeq counterpart lie below the identity line. Genes  
325 able to be quantified with FADU but not in HTSeq lie on the y-axis.

326 **Supplementary Figure 2: Comparison of TPM values derived from FADU to**  
327 **featureCounts overlap and fractional-overlap**

328 For each of the three different sets of RNA-Seq paired-end data from *E. coli*, *E. chaffeensis*, and *wBm*,  
329 the  $\log_2$  TPM values for genes quantitated using FADU were plotted against the  $\log_2$  TPM values for  
330 genes quantitated with two different featureCounts runs. **(a)** The first set of plots are run with the  
331 featureCounts option overlap, in which multiple genes overlapped by the same fragment are both  
332 assigned full counts. **(b)** The second set of plots are run with the featureCounts option overlap and  
333 fractional, in which multiple genes overlapped by the same fragment are assigned fractional counts  
334 depending on the number of features overlapped by the fragment. Each point is representative of a  
335 single gene, with points in blue being representative of genes  $\leq 300$  bp in length. Genes with similar  
336 count values are expected to lie close to the identity line ( $x=y$ ; red). Genes whose expression values are  
337 more elevated in FADU lie above the identity line while genes whose expression values are elevated in  
338 its featureCounts counterpart lie below the identity line. Genes able to be quantified in featureCounts  
339 overlap or fractional-overlap but not FADU lie on the x-axis.

340 **Supplementary Figure 3: Clustering of the twenty top contributing *wBm* genes in**  
341 **the first and second principal components**

342 Two heatmaps were generated to visualize the top contributing in **(a)** the first and **(b)** the second  
343 principal components analysis of the variation in counts for *wBm* genes derived using HTSeq,  
344 featureCounts, and FADU. For each of the two principal components, the top twenty contributing genes  
345 to the variation observed are shown. The horizontal axis of the heatmap describes the tool used while  
346 each of the genes are indicated on the vertical axis. The  $\log_2$  count values are shown in each of the  
347 corresponding cells.

**A**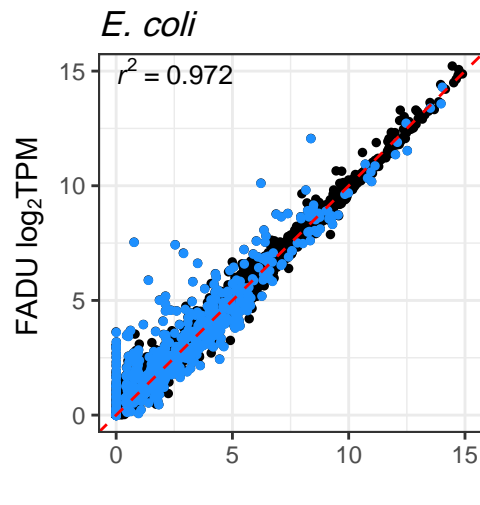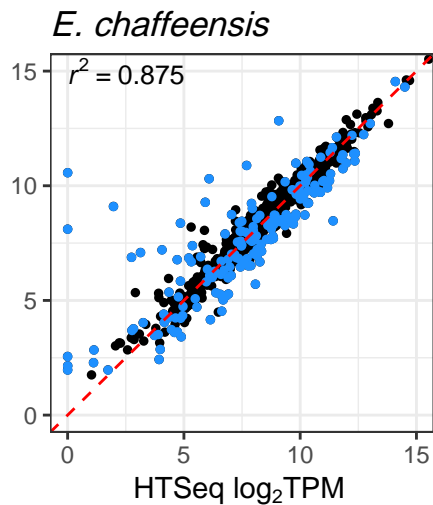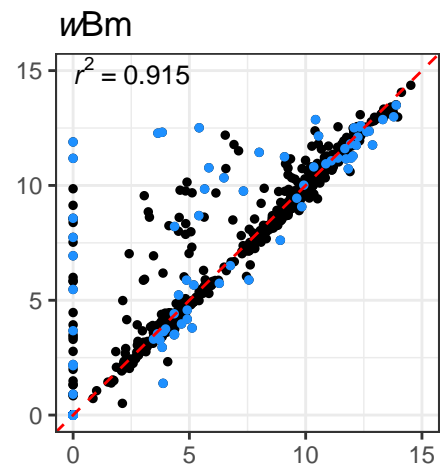**B**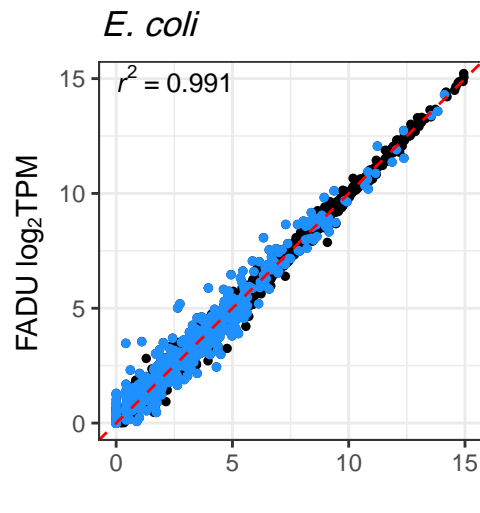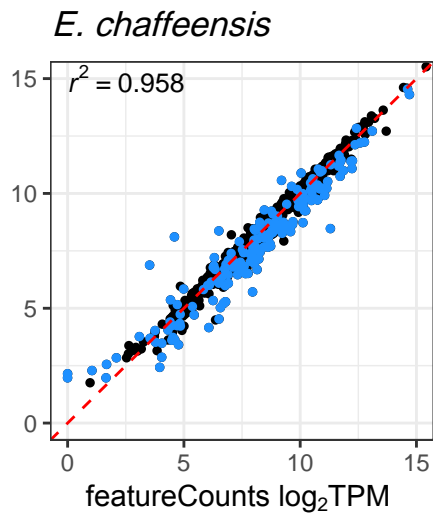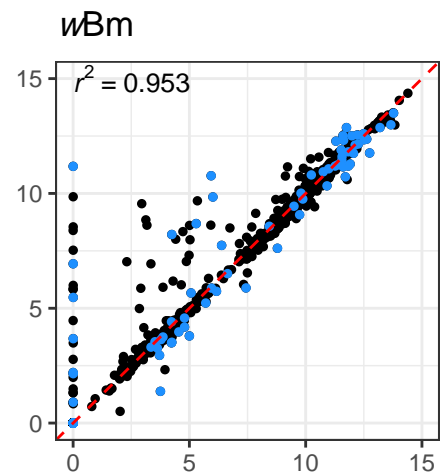

**A**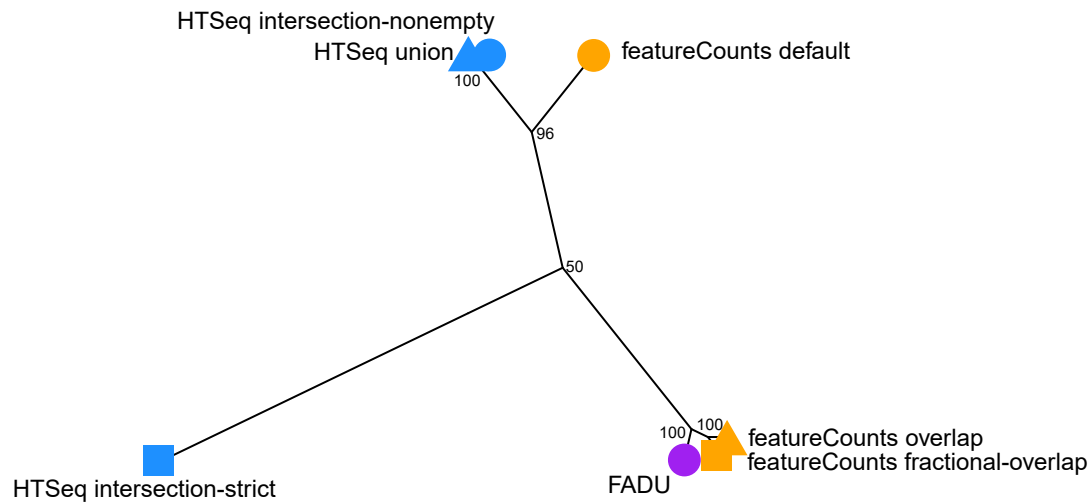**C**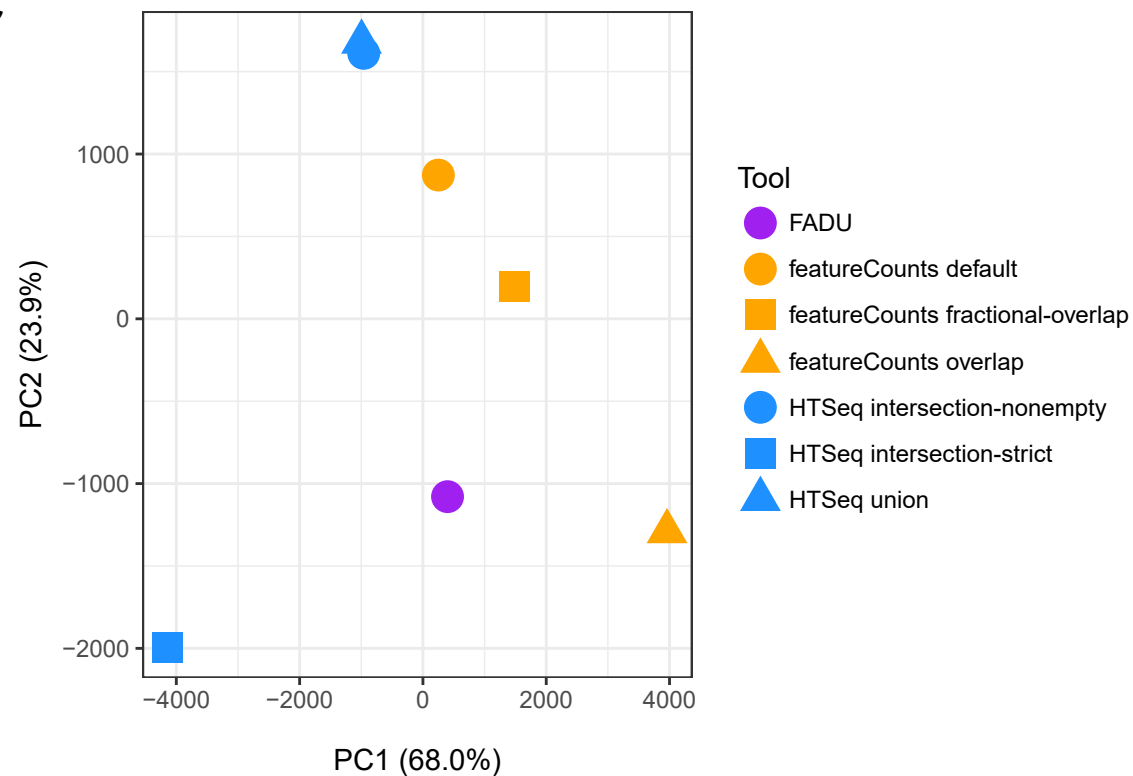**B**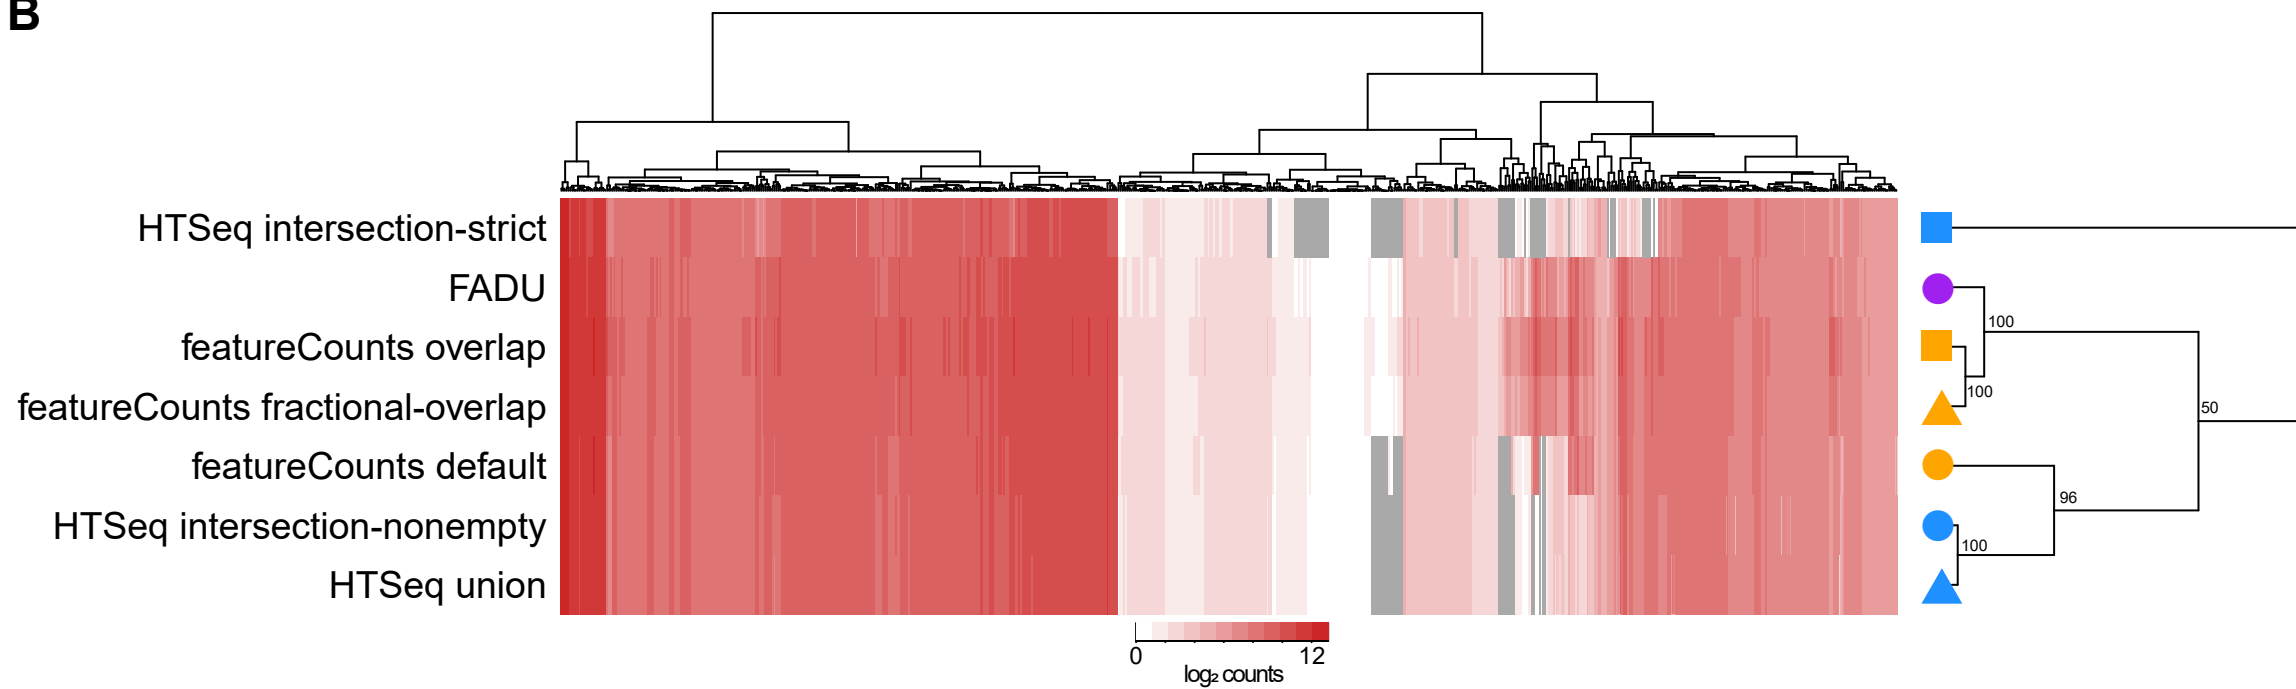

Source: https://www.biorxiv.org/content/10.1101/337600v1.full.pdf
